# Supplementary material for: Charged Small Molecule Binding to Membranes in MD Simulations Evaluated against NMR Experiments
Source: PubMed Central journal article supplement (PMC9483918; doi:10.1021/acs.jpcb.2c05024), 2022-09-05
Supplement: jp2c05024_si_001.pdf [file jp2c05024_si_001.pdf]

# Supporting Information for: Charged Small Molecule Binding to Membranes in MD Simulations Evaluated Against NMR Experiments

Ricky Nencini and O. H. Samuli Ollila\*

*Institute of Biotechnology, University of Helsinki, 00014 University of Helsinki, Finland*

E-mail: samuli.ollila@helsinki.fi

## Partial charges of TPP

a)

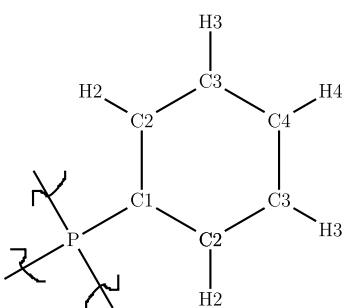

b)

| Atom | CHARMM36 Protein | B3LYP  | B3LYP ECC | Clarke | Clarke ECC |
|------|------------------|--------|-----------|--------|------------|
| P    | 1.000            | 0.184  | 0.13800   | 0.728  | 0.546      |
| C1   | 0.000            | 0.044  | 0.03300   | -0.111 | -0.083     |
| C2   | -0.115           | -0.047 | -0.03525  | -0.170 | -0.128     |
| C3   | -0.115           | -0.091 | -0.06825  | -0.150 | -0.113     |
| C4   | -0.115           | -0.053 | -0.03975  | -0.143 | -0.107     |
| H2   | 0.115            | 0.061  | 0.04575   | 0.199  | 0.150      |
| H3   | 0.115            | 0.125  | 0.09375   | 0.188  | 0.141      |
| H4   | 0.115            | 0.117  | 0.08775   | 0.188  | 0.141      |

Figure S1: a) Chemical structure and atom names of tetraphenylphosphonium with four identical phenyl rings. For simplicity only one ring is shown b) Partial charges obtained from phenyl ring in phenyl-alanine in protein CHARMM36 force field (CHARMM36 Protein), calculated with Gaussian using B3LYP functional, 6-31G\*\* basis set (B3LYP), obtained from literature<sup>1</sup> (Clarke), and the respective ECC variants (B3LYP ECC and Clarke ECC).

## Partial charges of etidocaine

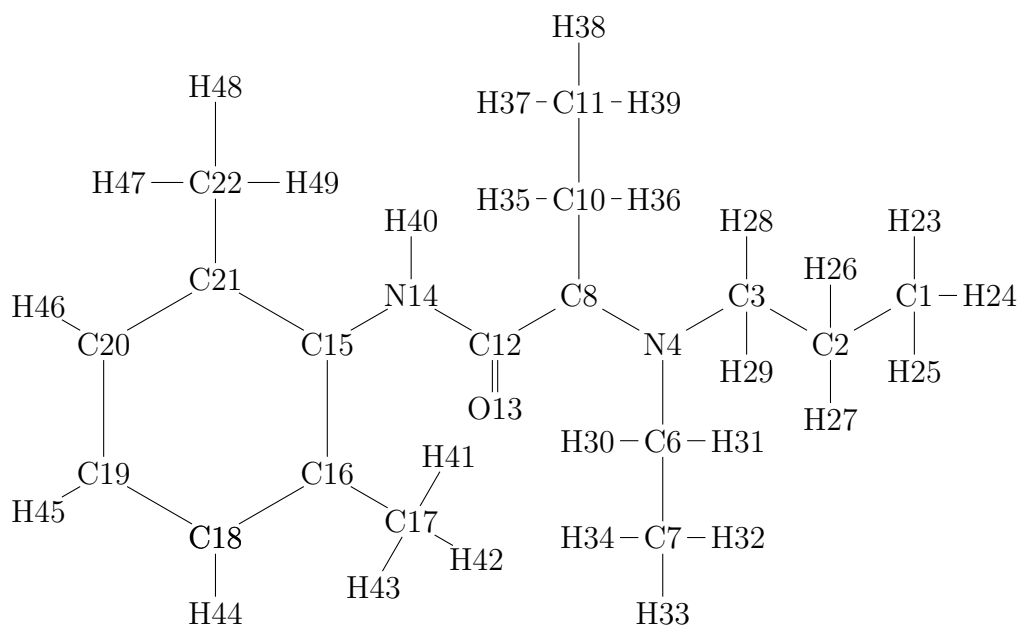

Figure S2: Chemical structure and atom names of etidocaine.

Table S1: Partial charges of etidocaine from SwissParam and Cgenff (ParamChem), and after applying ECC for Cgenff parameters.

| Atom | SwissParam | ParamChem | ParamChem<br>ECC |
|------|------------|-----------|------------------|
| C15  | 0.1170     | 0.191     | 0.14325          |
| C16  | -0.1435    | -0.010    | -0.00750         |
| C18  | -0.1500    | -0.113    | -0.08475         |
| C19  | -0.1500    | -0.115    | -0.08625         |
| C20  | -0.1500    | -0.113    | -0.08475         |
| C21  | -0.1435    | -0.010    | -0.00750         |
| C1   | 0.0000     | -0.272    | -0.20400         |
| C2   | 0.0000     | -0.177    | -0.13275         |
| C3   | 0.5030     | 0.121     | 0.09075          |
| N4   | -0.9590    | -0.351    | -0.26325         |
| H5   | 0.4500     | 0.320     | 0.24000          |
| C6   | 0.5030     | 0.127     | 0.09525          |
| C7   | 0.0000     | -0.268    | -0.20100         |
| C8   | 0.5640     | 0.397     | 0.29775          |
| H9   | 0.0000     | 0.090     | 0.06750          |
| C10  | 0.0000     | -0.220    | -0.16500         |
| C11  | 0.0000     | -0.256    | -0.19200         |
| C12  | 0.5690     | 0.373     | 0.27975          |
| O13  | -0.5700    | -0.490    | -0.36750         |
| N14  | -0.5470    | -0.423    | -0.31725         |
| C17  | 0.1435     | -0.267    | -0.20025         |
| C22  | 0.1435     | -0.267    | -0.20025         |
| H23  | 0.0000     | 0.090     | 0.06750          |
| H24  | 0.0000     | 0.090     | 0.06750          |
| H25  | 0.0000     | 0.090     | 0.06750          |
| H26  | 0.0000     | 0.090     | 0.06750          |
| H27  | 0.0000     | 0.090     | 0.06750          |
| H28  | 0.0000     | 0.090     | 0.06750          |
| H29  | 0.0000     | 0.090     | 0.06750          |
| H30  | 0.0000     | 0.090     | 0.06750          |
| H31  | 0.0000     | 0.090     | 0.06750          |
| H32  | 0.0000     | 0.090     | 0.06750          |
| H33  | 0.0000     | 0.090     | 0.06750          |
| H34  | 0.0000     | 0.090     | 0.06750          |
| H35  | 0.0000     | 0.090     | 0.06750          |
| H36  | 0.0000     | 0.090     | 0.06750          |
| H37  | 0.0000     | 0.090     | 0.06750          |
| H38  | 0.0000     | 0.090     | 0.06750          |
| H39  | 0.0000     | 0.090     | 0.06750          |
| H40  | 0.3700     | 0.318     | 0.23850          |
| H41  | 0.0000     | 0.090     | 0.06750          |
| H42  | 0.0000     | 0.090     | 0.06750          |
| H43  | 0.0000     | 0.090     | 0.06750          |
| H44  | 0.1500     | 0.115     | 0.08625          |
| H45  | 0.1500     | 0.115     | 0.08625          |
| H46  | 0.1500     | 0.115     | 0.08625          |
| H47  | 0.0000     | 0.090     | 0.06750          |
| H48  | 0.0000     | 0.090     | 0.06750          |
| H49  | 0.0000     | 0.090     | 0.06750          |

## Calculation of the number of bound molecules

Defining the number of bound molecules to membranes is not straightforward in MD simulations.<sup>2</sup> Nevertheless, the number of simple ions in the vicinity of lipid oxygens seems to be practically independent on the selected cut-off approximately between 0.25-0.45,<sup>3</sup> thereby being probably a reasonable measure for the number of bound ions. The case of molecules with multiple atoms is more complicated because also the minimum number of small molecule-lipid contacts required for the interpreted binding needs to be defined. Inspired by the approach used for simple ions,<sup>3</sup> we first calculated the number of bound molecules as a function of cut-off value and the required number of contacts (Fig. S3 a), and then calculated the point of smallest divergence with non-zero value from this 3D graph (Fig. S3 b). At this point, the result is least dependent on the definition of bound molecules, and its value was therefore used as the definition for the number of bound molecules.

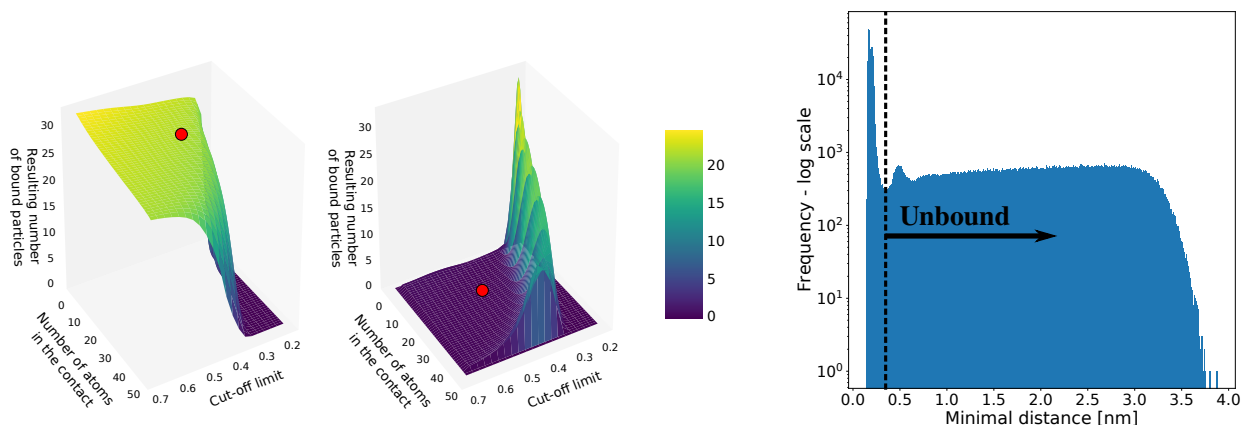

Figure S3: **a)**: Number of bound particles as a function of cut-off distance and the required minimum number of particle's atoms in contact with lipids for a simulation with 140 mM Etidocaine and repeat distance of 12 nm. **b)**: Divergence of the data in a). The point with smallest divergence with non-zero number of bound molecules is used as the definition for the number of bound particles. **c)**: Histogram of minimal distances between any etidocaine and lipid atom as analyzed in.<sup>4</sup>

Alternative approach used to determine the number of bound molecules with multiple atoms to membranes is based on the histogram of minimum distances between any lipid atom and any atom of the particle of interest.<sup>4</sup> The histogram is characterized by the peak

at small distances followed by a minima, found at 0.45 nm in Fig. S3c, and the particles with the minimum distance below this value are then defined to be bound. Resulting numbers of bound molecules are comparable between the two definitions.

## Binding coefficients from the literature

Table S2: Binding coefficients of different molecules reported in the literature determined from NMR data by assuming a model for the binding to lipids.

| Binding Particle      | Reference                                                                                               | Reported Binding Constant | Model Used                   |
|-----------------------|---------------------------------------------------------------------------------------------------------|---------------------------|------------------------------|
| Ca, no NaCl           | <a href="https://doi.org/10.1021/bi00312a019">https://doi.org/10.1021/bi00312a019</a>                   | 7.0 M <sup>-1</sup>       | ternary complex              |
| Ca, 0.1M NaCl         | <a href="https://doi.org/10.1021/bi00312a019">https://doi.org/10.1021/bi00312a019</a>                   | 13.7 M <sup>-1</sup>      | ternary complex              |
| TPP, 0.1M NaCl        | <a href="https://doi.org/10.1016/0005-2736(85)90016-1">https://doi.org/10.1016/0005-2736(85)90016-1</a> | 21 M <sup>-2</sup>        | Langmuir 1:8.3               |
| Eticocaine, 0.1M NaCl | <a href="https://doi.org/10.1016/0005-2736(88)90070-3">https://doi.org/10.1016/0005-2736(88)90070-3</a> | 11 M <sup>-1</sup>        | Partition eq.                |
| Dibucaine, 0.1M NaCl  | <a href="https://doi.org/10.1016/0005-2736(88)90070-3">https://doi.org/10.1016/0005-2736(88)90070-3</a> | 660 M <sup>-1</sup>       | Partition eq.                |
| SMS, 0.1M NaCl        | <a href="https://doi.org/10.1021/bi00501a018">https://doi.org/10.1021/bi00501a018</a>                   | 66 M <sup>-1</sup>        | Partition eq. + Gouy-Chapman |

## Dependence on simulation box size

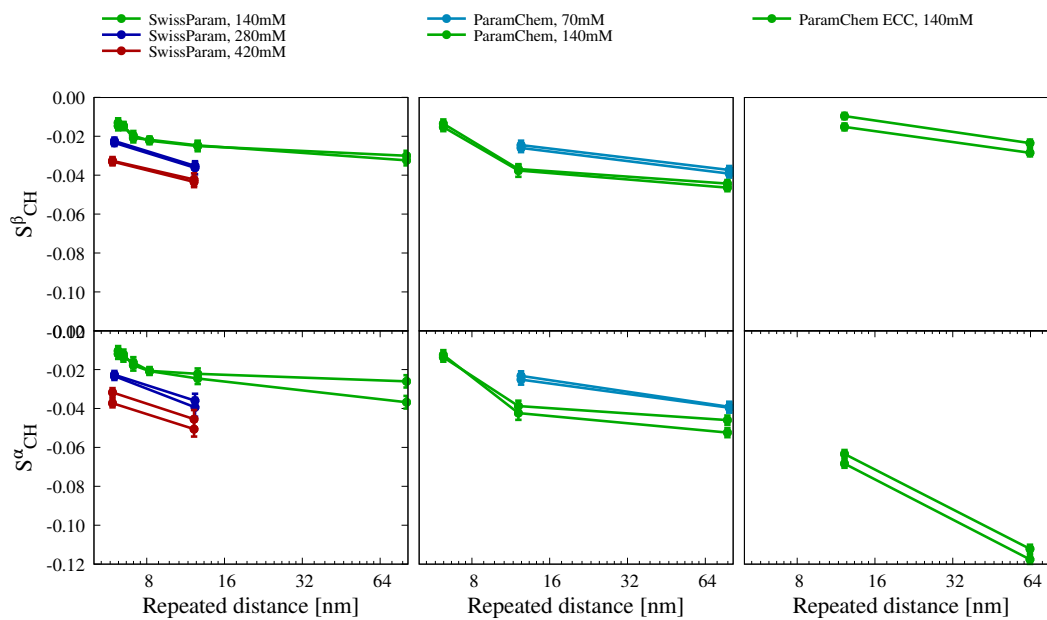

Figure S4: Dependence of the POPC headgroup order parameters on the simulation box size in the membrane normal direction (repeat distance) with different etidocaine concentrations and different force fields (left: CHARMM36-SwissParam, middle: CHARMM36-ParamChem, right: CHARMM36-ParamChemECC).

# Equilibration of the simulations

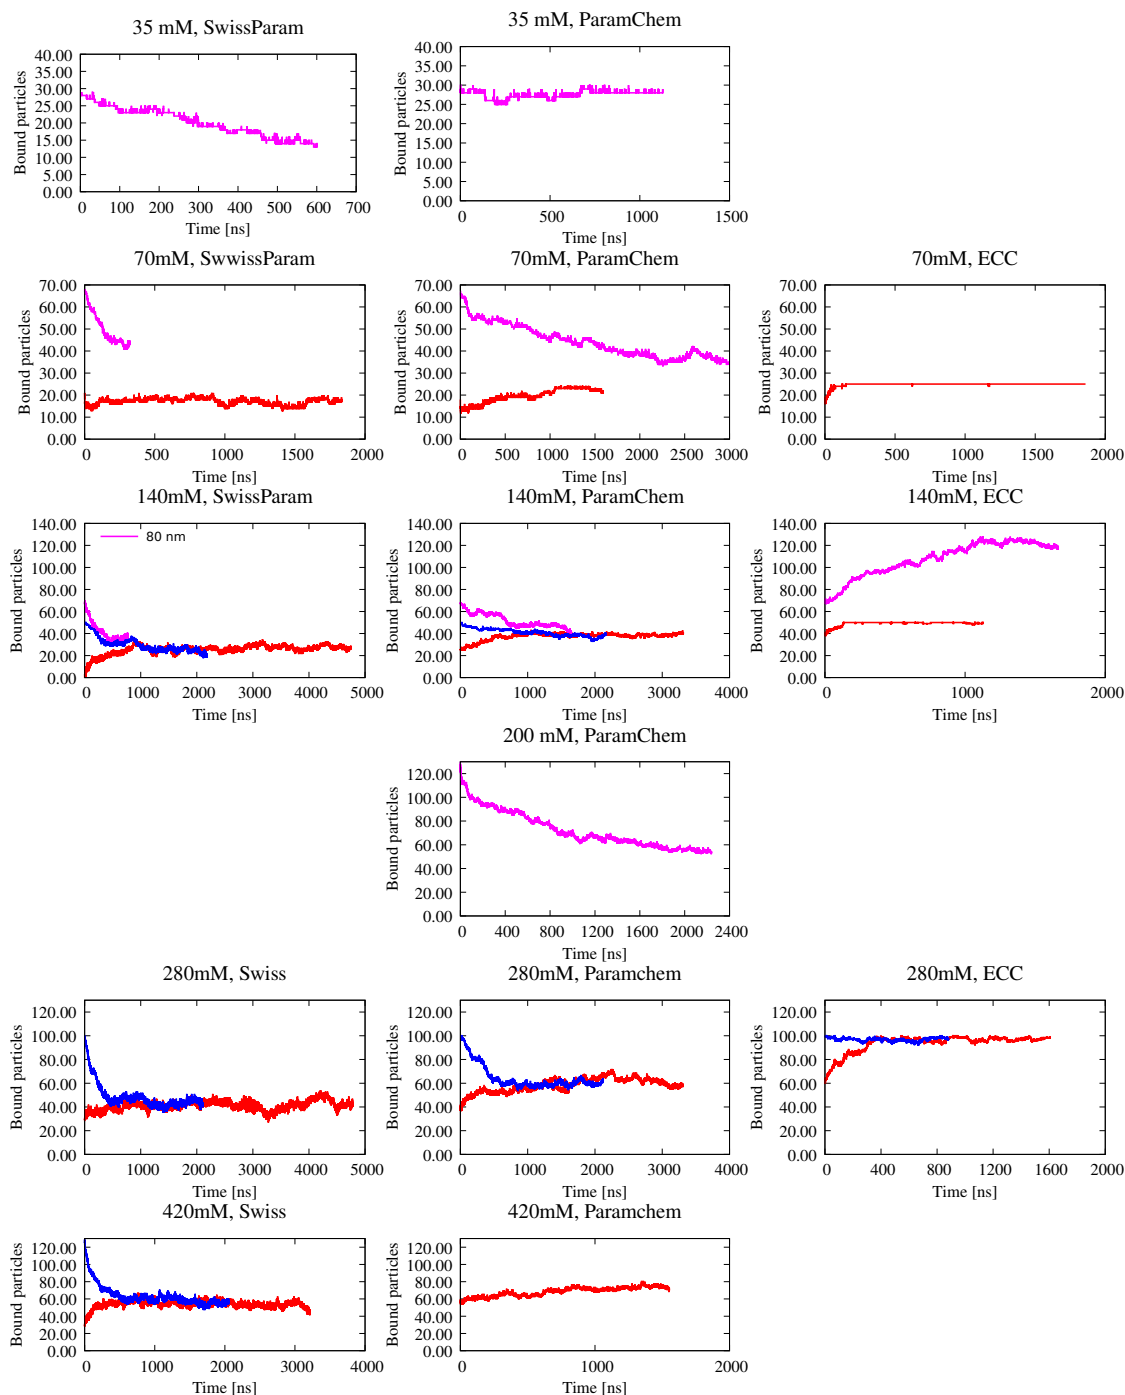

Figure S5: **Binding of Etidocaine, ETI, in time** Left column: systems run with SwissParam force field. Middle column: systems run with ParamChem force field. Right column: systems run with ECC version of ParamChem force field. In red: systems with approximately 20 000 water molecules (repeat distance  $\sim 12$  nm) started from unsaturated binding state. In blue: systems with approximately 20 000 water molecules started from over-saturated binding state. In magenta: systems simulated with 177 600 water molecules (repeat distance  $\sim 12$  nm).

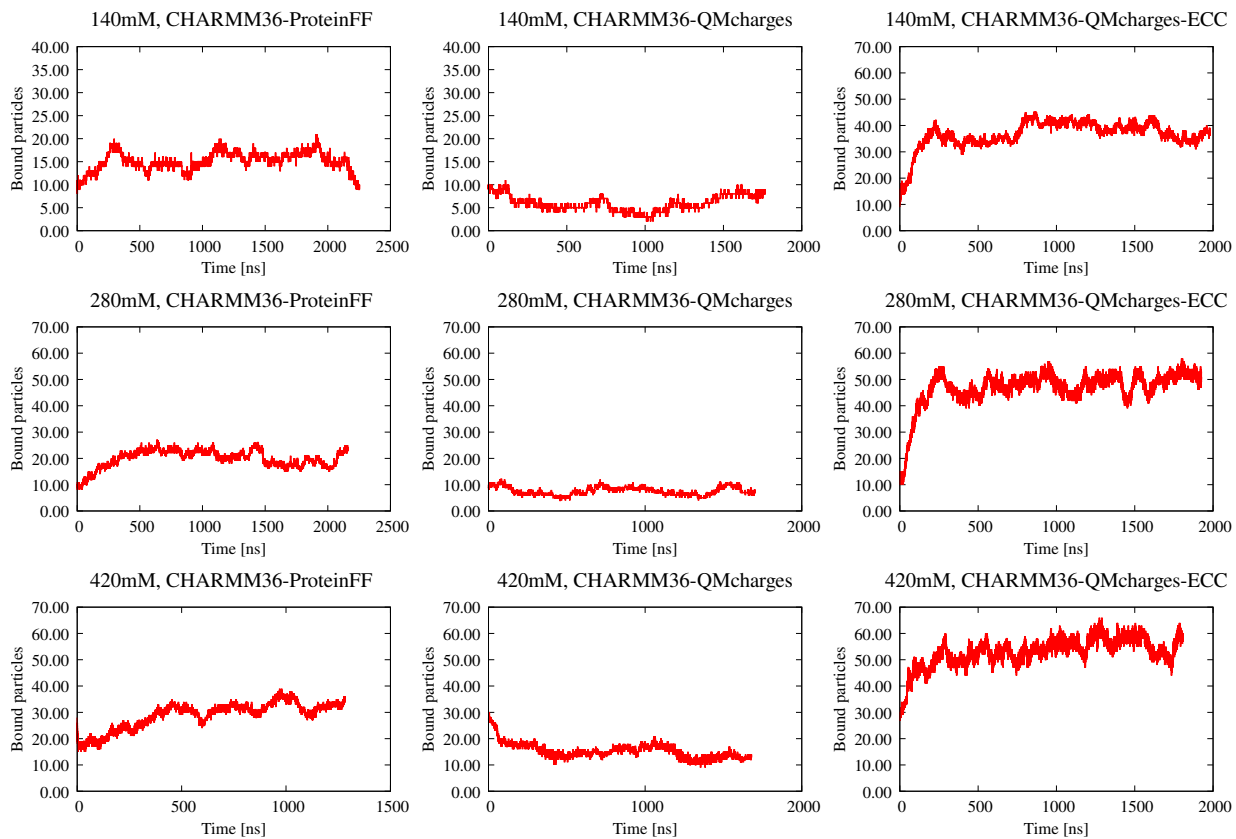

Figure S6: Number of bound TPP to POPC membrane as a function of time at different concentrations from simulations with different force field parameters used in the main text: CHARMM36-ProteinFF (left), CHARMM36-QMcharges (middle) and CHARMM36-QMcharges-ECC (right).



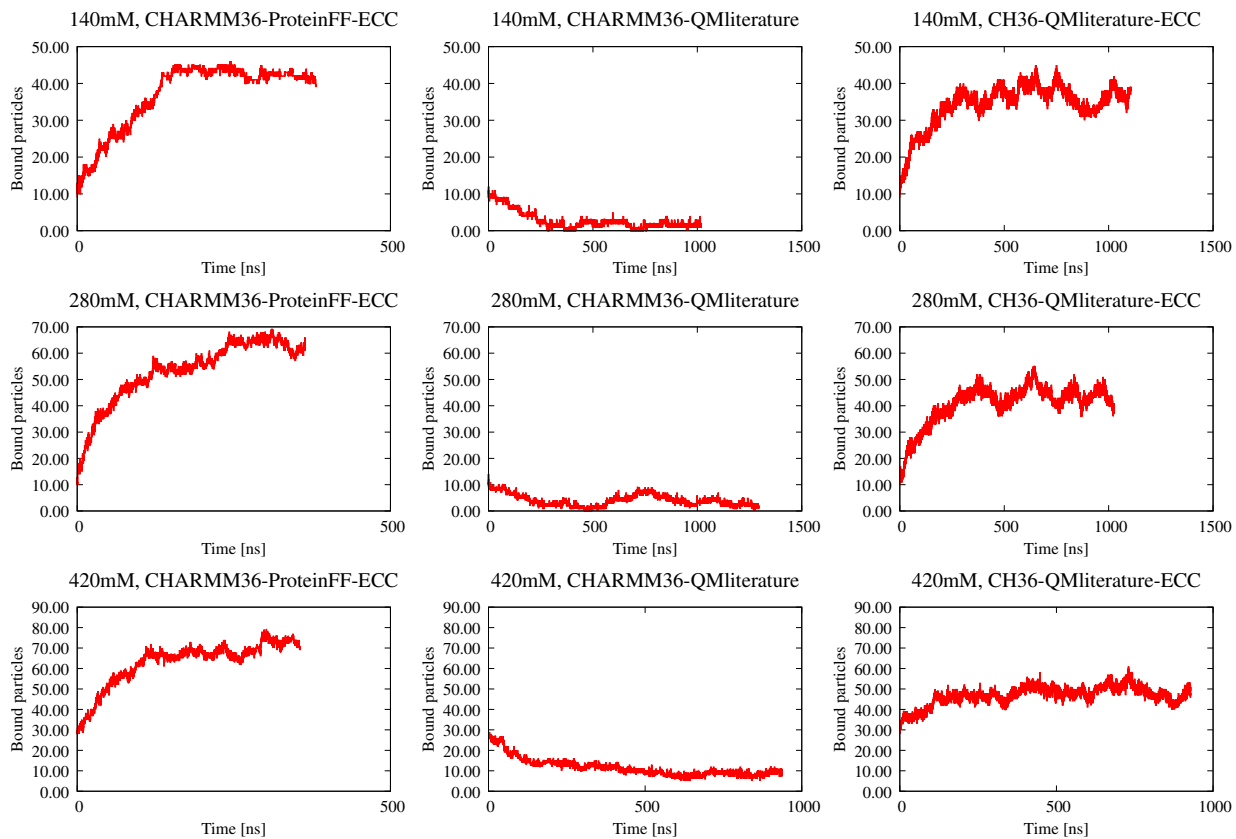

Figure S7: Number of bound TPP to POPC membrane as a function of time at different concentrations from simulations with different force field parameters that were not used in the main text: CHARM36-ProteinFF with an ECC (left), CHARM36 force field with charges taken from literature<sup>5</sup> (middle) and ECC applied to the charges from the literature<sup>5</sup> (right).

## Density profiles

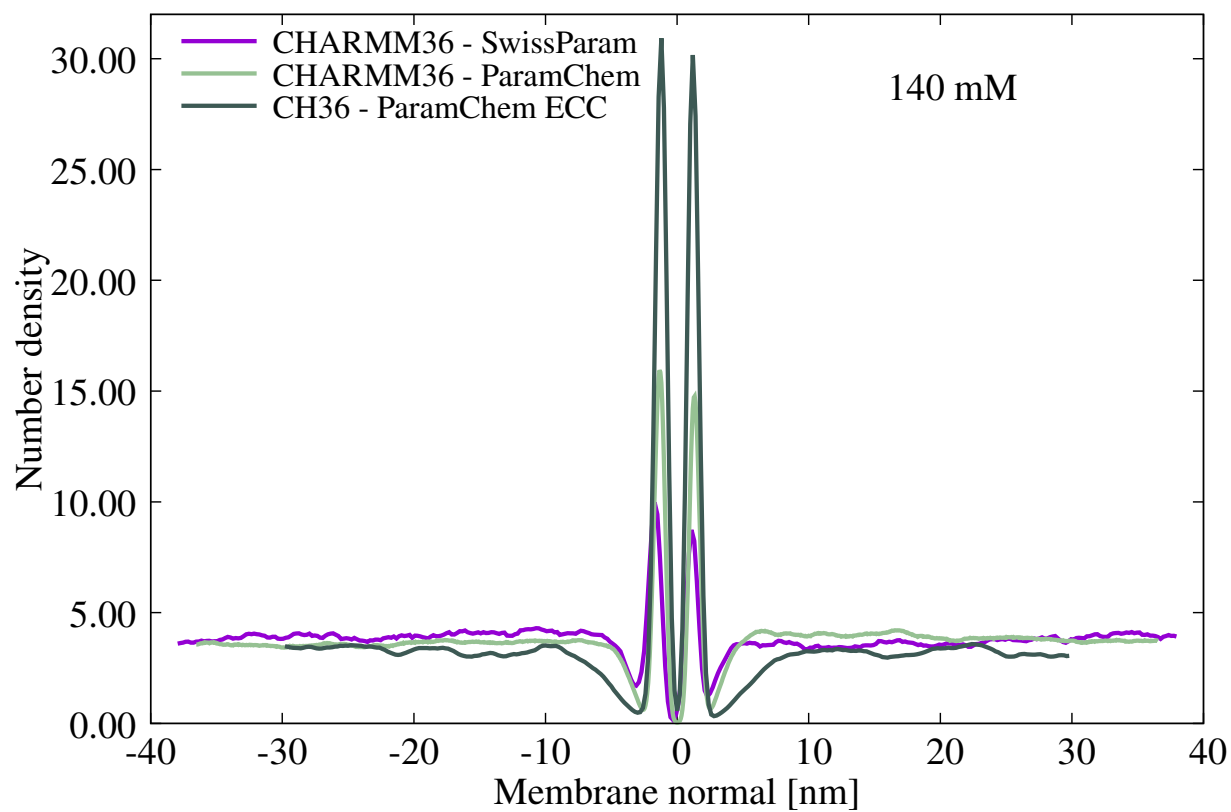

Figure S8: Molecule number density profiles of Etidocaine from simulations with POPC bilayer using different force field parameters. Profiles are calculated from systems with large box containing 177600 water molecules and 140 mM of etidocaine.

# Simulated systems

## Etidocaine

Table S3: Simulated POPC bilayer system with etidocaine using CHARMM36-SwissParam parameters. All systems contain 200 lipids, have  $\text{Cl}^-$  counter ions, and were simulated at at 298 K.

| Etidocaine concentration <sup>a</sup><br>[mM] | Length<br>[ns] | Equil. <sup>b</sup><br>[ns] | ETI <sup>c</sup> /<br>$\text{Cl}^-$ <sup>c</sup> | Waters <sup>c</sup> | Repeat distance <sup>d</sup><br>[nm] | APL <sup>d</sup><br>[nm <sup>2</sup> ] | Ref. <sup>e</sup> |
|-----------------------------------------------|----------------|-----------------------------|--------------------------------------------------|---------------------|--------------------------------------|----------------------------------------|-------------------|
| 69                                            | 1 838          | 200                         | 25                                               | 19 900              | 12.7                                 | 0.67                                   | 6                 |
| 138                                           | 4 744          | 800                         | 50                                               | 20 000              | 12.6                                 | 0.69                                   | 7                 |
| 138 <sup>e</sup>                              | 2 183          | 1000                        | 50                                               | 20 000              | 12.6                                 | 0.68                                   | 8                 |
| 138                                           | 1 142          | 414                         | 444                                              | 177 600             | 80.7                                 | 0.71                                   | 9                 |
| 280                                           | 5 092          | 900                         | 100                                              | 19 800              | 12.3                                 | 0.72                                   | 10                |
| 280 <sup>e</sup>                              | 2 114          | 500                         | 100                                              | 19 800              | 12.2                                 | 0.72                                   | 11                |
| 418                                           | 3 212          | 500                         | 150                                              | 19 872              | 12.2                                 | 0.74                                   | 12                |
| 418 <sup>e</sup>                              | 2 057          | 1000                        | 150                                              | 19 872              | 12.2                                 | 0.75                                   | 13                |
| 12 <sup>f</sup>                               | 299            | 200                         | 2                                                | 8 873               | 8.0                                  | 0.64                                   | —                 |
| 36 <sup>f</sup>                               | 601            | 601                         | 111                                              | 166 608             | —                                    | —                                      | —                 |
| 69 <sup>f</sup>                               | 324            | 324                         | 222                                              | 177 600             | —                                    | —                                      | —                 |
| 139 <sup>f</sup>                              | 713            | 200                         | 13                                               | 5 187               | 6.2                                  | 0.66                                   | —                 |
| 139 <sup>f</sup>                              | 1 123          | 400                         | 15                                               | 5 970               | 6.5                                  | 0.67                                   | —                 |
| 139 <sup>f</sup>                              | 987            | 550                         | 19                                               | 7 562               | 7.1                                  | 0.67                                   | —                 |
| 139 <sup>f</sup>                              | 1 754          | 200                         | 25                                               | 9 950               | 8.2                                  | 0.68                                   | —                 |
| 278 <sup>f</sup>                              | 1 693          | 200                         | 26                                               | 5 174               | 6.0                                  | 0.68                                   | —                 |
| 416 <sup>f</sup>                              | 1 345          | 200                         | 39                                               | 5 200               | 5.9                                  | 0.71                                   | —                 |
| 555 <sup>f</sup>                              | 646            | 100                         | 52                                               | 5 200               | 5.8                                  | 0.73                                   | —                 |

a) Calculated as  $\text{ETI}/\text{waters} * 55.5 * 1000$ .

b) Beginning part of the simulation left out as equilibration.

c) Number of molecules in the system.

d) Analysed from the equilibrated part.

e) Excessive number of etidocaine molecules was bound at the beginning.

f) Used for equilibration and box size experiments.

e) The number of reference where simulation files are available.

Table S4: Simulated POPC bilayer system with etidocaine using CHARMM36-ParamChem parameters. All systems contain 200 lipids, have  $\text{Cl}^-$  counter ions, and were simulated at 298 K.

| <b>Etidocaine concentration<sup>a</sup></b><br>[mM] | <b>Length</b><br>[ns] | <b>Equil.<sup>b</sup></b><br>[ns] | <b>ETI<sup>c</sup>/<br/>Cl<sup>-</sup></b> <sup>c</sup> | <b>Waters<sup>c</sup></b> | <b>Repeat distance<sup>d</sup></b><br>[nm] | <b>APL<sup>d</sup></b><br>[nm <sup>2</sup> ] | <b>Ref.<sup>g</sup></b> |
|-----------------------------------------------------|-----------------------|-----------------------------------|---------------------------------------------------------|---------------------------|--------------------------------------------|----------------------------------------------|-------------------------|
| 34                                                  | 1 267                 | 200                               | 111                                                     | 177 600                   | 80.4                                       | 0.69                                         | 14                      |
| 69                                                  | 2 988                 | 2 200                             | 222                                                     | 177 600                   | 79.2                                       | 0.71                                         | 15                      |
| 138                                                 | 1 648                 | 730                               | 444                                                     | 177 600                   | 77.9                                       | 0.74                                         | 16                      |
| 200                                                 | 2 599                 | 2 000                             | 640                                                     | 177 600                   | 77.5                                       | 0.75                                         | 17                      |
| 69 <sup>f</sup>                                     | 1 596                 | 1 100                             | 25                                                      | 19 900                    | 12.4                                       | 0.68                                         | —                       |
| 139 <sup>f</sup>                                    | 667                   | 0                                 | 13                                                      | 5 187                     | 6.2                                        | 0.66                                         | —                       |
| 138 <sup>f</sup>                                    | 3 628                 | 500                               | 50                                                      | 20 000                    | 12.1                                       | 0.72                                         | —                       |
| 138 <sup>e,f</sup>                                  | 2 167                 | 1 300                             | 50                                                      | 20 000                    | 12.1                                       | 0.71                                         | —                       |
| 138 <sup>f</sup>                                    | 588                   | 588                               | 444                                                     | 177 600                   | —                                          | —                                            | —                       |
| 278 <sup>f</sup>                                    | 664                   | 200                               | 26                                                      | 5 174                     | 6.0                                        | 0.68                                         | —                       |
| 280 <sup>f</sup>                                    | 3 610                 | 1 323                             | 100                                                     | 19 800                    | 11.5                                       | 0.76                                         | —                       |
| 280 <sup>e,f</sup>                                  | 2 123                 | 500                               | 100                                                     | 19 800                    | 11.5                                       | 0.76                                         | —                       |
| 416 <sup>f</sup>                                    | 656                   | 50                                | 39                                                      | 5 200                     | 5.9                                        | 0.71                                         | —                       |
| 418 <sup>f</sup>                                    | 3 552                 | 800                               | 150                                                     | 19 872                    | 11.5                                       | 0.78                                         | —                       |
| 418 <sup>e,f</sup>                                  | 2 083                 | 500                               | 150                                                     | 19 872                    | 11.5                                       | 0.79                                         | —                       |
| 1972 <sup>f</sup>                                   | 669                   | 669                               | 400                                                     | 11 252                    | —                                          | —                                            | —                       |

a) Calculated as  $\text{ETI}/\text{waters} * 55.5 * 1000$ .

b) Beginning part of the simulation left out as equilibration.

c) Number of molecules in the system.

d) Analysed from the equilibrated part.

e) Excessive number of etidocaine molecules was bound at the beginning.

f) Used for equilibration and box size experiments.

g) The number of reference where simulation files are available.

Table S5: Simulated POPC bilayer system with etidocaine using CHARMM36-ParamChem-ECC parameters. All systems contain 200 lipids, have  $\text{Cl}^-$  counter ions, and were simulated at at 298 K.

| <b>Etidocaine concentration<sup>a</sup></b><br>[mM] | <b>Length</b><br>[ns] | <b>Equil.<sup>b</sup></b><br>[ns] | <b>ETI<sup>c</sup>/<br/>Cl<sup>-</sup></b> <sup>c</sup> | <b>Waters<sup>c</sup></b> | <b>Repeat distance<sup>d</sup></b><br>[nm] | <b>APL<sup>d</sup></b><br>[nm <sup>2</sup> ] | <b>Ref.<sup>g</sup></b> |
|-----------------------------------------------------|-----------------------|-----------------------------------|---------------------------------------------------------|---------------------------|--------------------------------------------|----------------------------------------------|-------------------------|
| 138                                                 | 1 664                 | 1 100                             | 444                                                     | 177 600                   | 63.7                                       | 0.9                                          | 18                      |
| 69 <sup>f</sup>                                     | 1 859                 | 200                               | 25                                                      | 19 900                    | 13.0                                       | 0.65                                         | —                       |
| 138 <sup>f</sup>                                    | 1 132                 | 200                               | 50                                                      | 20 000                    | 12.2                                       | 0.71                                         | —                       |
| 280 <sup>f</sup>                                    | 1 609                 | 500                               | 100                                                     | 19 800                    | 10.7                                       | 0.83                                         | —                       |
| 280 <sup>e,f</sup>                                  | 881                   | 50                                | 100                                                     | 19 800                    | 10.7                                       | 0.83                                         | —                       |

a) Calculated as  $\text{ETI}/\text{waters} * 55.5 * 1000$ .

b) Beginning part of the simulation left out as equilibration.

c) Number of molecules in the system.

d) Analysed from the equilibrated part.

e) Excessive number of etidocaine molecules was bound at the beginning.

f) Used for equilibration and box size experiments.

g) The number of reference where simulation files are available.

## Tetraphenylphosphonium ion

Table S6: Simulated POPC bilayer system with tetraphenylphosphonium ions using CHARMM36-ProteinFF parameters. All systems contain 200 lipids, have  $\text{Cl}^-$  counter ions, and were simulated at 298 K.

| TPP concentration <sup>a</sup><br>[mM] | Length<br>[ns] | Equil. <sup>b</sup><br>[ns] | TPP <sup>c</sup> /<br>$\text{Cl}^-$ <sup>c</sup> | Waters <sup>c</sup> | Repeat distance <sup>d</sup><br>[nm] | APL <sup>d</sup><br>[nm <sup>2</sup> ] | Ref. <sup>f</sup> |
|----------------------------------------|----------------|-----------------------------|--------------------------------------------------|---------------------|--------------------------------------|----------------------------------------|-------------------|
| 138                                    | 2 283          | 200                         | 50                                               | 20 000              | 12.9                                 | 0.67                                   | 19                |
| 277                                    | 2 194          | 500                         | 100                                              | 20 000              | 13.1                                 | 0.68                                   | 20                |
| 416                                    | 2 000          | 500                         | 150                                              | 20 000              | 13.1                                 | 0.70                                   | 21                |
| 106 <sup>e</sup>                       | 672            | 0                           | 10                                               | 5 210               | 6.2                                  | 0.65                                   | —                 |
| 212 <sup>e</sup>                       | 323            | 130                         | 20                                               | 5 220               | 6.2                                  | 0.67                                   | —                 |
| 100 <sup>e</sup>                       | 563            | 400                         | 20                                               | 11 041              | 8.9                                  | 0.66                                   | —                 |

a) Calculated as  $\text{TPP}/\text{waters} * 55.5 * 1000$ .

b) Beginning part of the simulation left out as equilibration.

c) Number of molecules in the system.

d) Analysed from the equilibrated part.

e) Used for equilibration and box size experiments.

f) The number of reference where simulation files are available.

Table S7: Simulated POPC bilayer system with tetraphenylphosphonium ions using CHARMM36-ProteinFF-ECC parameters. All systems contain 200 lipids, have  $\text{Cl}^-$  counter ions, and were simulated at 298 K.

| TPP concentration <sup>a</sup><br>[mM] | Length<br>[ns] | Equil. <sup>b</sup><br>[ns] | TPP <sup>c</sup> /<br>$\text{Cl}^-$ <sup>c</sup> | Waters <sup>c</sup> | Repeat distance <sup>d</sup><br>[nm] | APL <sup>d</sup><br>[nm <sup>2</sup> ] | Ref. <sup>e</sup> |
|----------------------------------------|----------------|-----------------------------|--------------------------------------------------|---------------------|--------------------------------------|----------------------------------------|-------------------|
| 138                                    | 1 039          | 160                         | 50                                               | 20 000              | 12.3                                 | 0.71                                   | 22                |
| 277                                    | 1 007          | 250                         | 100                                              | 20 000              | 11.8                                 | 0.76                                   | 23                |
| 416                                    | 994            | 300                         | 150                                              | 20 000              | 12.0                                 | 0.77                                   | 24                |

a) Calculated as  $\text{TPP}/\text{waters} * 55.5 * 1000$ .

b) Beginning part of the simulation left out as equilibration.

c) Number of molecules in the system.

d) Analysed from the equilibrated part.

e) The number of reference where simulation files are available.

Table S8: Simulated POPC bilayer system with tetraphenylphosphonium ions using CHARMM36-QMcharges parameters. All systems contain 200 lipids, have  $\text{Cl}^-$  counter ions, and were simulated at 298 K.

| <b>TPP concentration<sup>a</sup></b><br>[mM] | <b>Length</b><br>[ns] | <b>Equil.<sup>b</sup></b><br>[ns] | <b>TPP<sup>c</sup>/<br/>Cl<sup>-</sup></b> | <b>Waters<sup>c</sup></b> | <b>Repeat distance<sup>d</sup></b><br>[nm] | <b>APL<sup>d</sup></b><br>[nm <sup>2</sup> ] | <b>Ref.<sup>e</sup></b> |
|----------------------------------------------|-----------------------|-----------------------------------|--------------------------------------------|---------------------------|--------------------------------------------|----------------------------------------------|-------------------------|
| 138                                          | 2 000                 | 200                               | 50                                         | 20 000                    | 13.3                                       | 0.65                                         | 25                      |
| 277                                          | 2 000                 | 400                               | 100                                        | 20 000                    | 13.6                                       | 0.66                                         | 26                      |
| 416                                          | 1 679                 | 400                               | 150                                        | 20 000                    | 13.8                                       | 0.67                                         | 27                      |

a) Calculated as  $\text{TPP}/\text{waters} * 55.5 * 1000$ .

b) Beginning part of the simulation left out as equilibration.

c) Number of molecules in the system.

d) Analysed from the equilibrated part.

e) The number of reference where simulation files are available.

Table S9: Simulated POPC bilayer system with tetraphenylphosphonium ions using CHARMM36-QMcharges-ECC parameters. All systems contain 200 lipids, have  $\text{Cl}^-$  counter ions, and were simulated at 298 K.

| <b>TPP concentration<sup>a</sup></b><br>[mM] | <b>Length</b><br>[ns] | <b>Equil.<sup>b</sup></b><br>[ns] | <b>TPP<sup>c</sup>/<br/>Cl<sup>-</sup></b> | <b>Waters<sup>c</sup></b> | <b>Repeat distance<sup>d</sup></b><br>[nm] | <b>APL<sup>d</sup></b><br>[nm <sup>2</sup> ] | <b>Ref.<sup>e</sup></b> |
|----------------------------------------------|-----------------------|-----------------------------------|--------------------------------------------|---------------------------|--------------------------------------------|----------------------------------------------|-------------------------|
| 138                                          | 2 000                 | 200                               | 50                                         | 20 000                    | 12.1                                       | 0.72                                         | 28                      |
| 277                                          | 2 000                 | 200                               | 100                                        | 20 000                    | 12.0                                       | 0.75                                         | 29                      |
| 416                                          | 2 000                 | 500                               | 150                                        | 20 000                    | 12.2                                       | 0.76                                         | 30                      |

a) Calculated as  $\text{TPP}/\text{waters} * 55.5 * 1000$ .

b) Beginning part of the simulation left out as equilibration.

c) Number of molecules in the system.

d) Analysed from the equilibrated part.

e) The number of reference where simulation files are available.

Table S10: Simulated POPC bilayer system with tetraphenylphosphonium ions using CHARMM36-QMcharges-Literature parameters, where QM charges are taken from literature.<sup>1</sup> All systems contain 200 lipids, have Cl<sup>-</sup> counter ions, and were simulated at 298 K.

| <b>TPP concentration<sup>a</sup></b><br>[mM] | <b>Length</b><br>[ns] | <b>Equil.<sup>b</sup></b><br>[ns] | <b>TPP<sup>c</sup>/<br/>Cl<sup>-</sup><sup>c</sup></b> | <b>Waters<sup>c</sup></b> | <b>Repeat distance<sup>d</sup></b><br>[nm] | <b>APL<sup>d</sup></b><br>[nm <sup>2</sup> ] | <b>Ref.<sup>e</sup></b> |
|----------------------------------------------|-----------------------|-----------------------------------|--------------------------------------------------------|---------------------------|--------------------------------------------|----------------------------------------------|-------------------------|
| 138                                          | 1472                  | 400                               | 50                                                     | 20 000                    | 13.6                                       | 0.64                                         | 31                      |
| 277                                          | 1410                  | 200                               | 100                                                    | 20 000                    | 13.9                                       | 0.64                                         | 32                      |
| 416                                          | 1490                  | 600                               | 150                                                    | 20 000                    | 14.2                                       | 0.65                                         | 33                      |

a) Calculated as TPP/waters \* 55.5 \* 1000.

b) Beginning part of the simulation left out as equilibration.

c) Number of molecules in the system.

d) Analysed from the equilibrated part.

e) The number of reference where simulation files are available.

Table S11: Simulated POPC bilayer system with tetraphenylphosphonium ions using CHARMM36-QMcharges-Literature-ECC parameters, where QM charges are taken from literature.<sup>1</sup> All systems contain 200 lipids, have Cl<sup>-</sup> counter ions, and were simulated at 298 K.

| <b>TPP concentration<sup>a</sup></b><br>[mM] | <b>Length</b><br>[ns] | <b>Equil.<sup>b</sup></b><br>[ns] | <b>TPP<sup>c</sup>/<br/>Cl<sup>-</sup><sup>c</sup></b> | <b>Waters<sup>c</sup></b> | <b>Repeat distance<sup>d</sup></b><br>[nm] | <b>APL<sup>d</sup></b><br>[nm <sup>2</sup> ] | <b>Ref.<sup>e</sup></b> |
|----------------------------------------------|-----------------------|-----------------------------------|--------------------------------------------------------|---------------------------|--------------------------------------------|----------------------------------------------|-------------------------|
| 138                                          | 1442                  | 400                               | 50                                                     | 20 000                    | 12.4                                       | 0.7                                          | 34                      |
| 277                                          | 1372                  | 400                               | 100                                                    | 20 000                    | 12.6                                       | 0.71                                         | 35                      |
| 416                                          | 1158                  | 500                               | 150                                                    | 20 000                    | 12.8                                       | 0.72                                         | 36                      |

a) Calculated as TPP/waters \* 55.5 \* 1000.

b) Beginning part of the simulation left out as equilibration.

c) Number of molecules in the system.

d) Analysed from the equilibrated part.

e) The number of reference where simulation files are available.



## SMS cyclic peptide

Table S12: Simulated POPC bilayer system with SMS cyclic peptide using CHARMM36-ProteinFF parameters. All systems contain 200 lipids, have  $\text{Cl}^-$  counter ions, and were simulated at 298 K.

| SMS concentration <sup>a</sup><br>[mM] | Length<br>[ns] | Equil. <sup>b</sup><br>[ns] | SMS <sup>c</sup> /<br>$\text{Cl}^-$ <sup>d</sup> | Waters <sup>c</sup> | Repeat distance <sup>e</sup><br>[nm] | APL <sup>e</sup><br>[nm <sup>2</sup> ] | Ref. <sup>g</sup> |
|----------------------------------------|----------------|-----------------------------|--------------------------------------------------|---------------------|--------------------------------------|----------------------------------------|-------------------|
| 12                                     | 284            | 100                         | 2                                                | 9 202               | 8.1                                  | 0.64                                   | —                 |
| 24                                     | 291            | 140                         | 4                                                | 9 016               | 8.0                                  | 0.65                                   | —                 |
| 32                                     | 277            | 50                          | 6                                                | 10 192              | 8.5                                  | 0.65                                   | —                 |
| 39                                     | 2 166          | 2 166                       | 18                                               | 25 234              | —                                    | —                                      | 37                |
| 41 <sup>f</sup>                        | 1 365          | 0                           | 15                                               | 20 000              | 12.2                                 | 0.70                                   | 38                |
| 45                                     | 270            | 150                         | 8                                                | 9 698               | 8.1                                  | 0.67                                   | —                 |
| 58                                     | 548            | 100                         | 10                                               | 9 535               | 8.0                                  | 0.67                                   | —                 |
| 74                                     | 360            | 190                         | 12                                               | 8 991               | 7.7                                  | 0.69                                   | —                 |
| 78                                     | 754            | 350                         | 14                                               | 9 948               | 8.1                                  | 0.70                                   | —                 |
| 93                                     | 281            | 281                         | 16                                               | 9 463               | —                                    | —                                      | —                 |

a) Calculated as  $\text{SMS}/\text{waters} * 55.5 * 1000$ .

b) Beginning part of the simulation left out as equilibration.

c) Number of molecules in the system.

d) Number of  $\text{Cl}^-$  is double of  $\text{SMS}^{2+}$

e) Analysed from the equilibrated part.

f) All SMS molecules were bound at the beginning.

g) The number of reference where simulation files are available.

## Dibucaine

Table S13: Simulated POPC bilayer system with dibucaine using CHARMM36-SwissParam parameters. All systems contain 200 lipids, have  $\text{Cl}^-$  counter ions, and were simulated at 298 K.

| Dibucaine concentration <sup>a</sup><br>[mM] | Length<br>[ns] | Equil. <sup>b</sup><br>[ns] | DIB <sup>c</sup> /<br>$\text{Cl}^-$ <sup>c</sup> | Waters <sup>c</sup> | Repeat distance <sup>d</sup><br>[nm] | APL <sup>d</sup><br>[nm <sup>2</sup> ] | Ref. <sup>e</sup> |
|----------------------------------------------|----------------|-----------------------------|--------------------------------------------------|---------------------|--------------------------------------|----------------------------------------|-------------------|
| 12                                           | 305            | 50                          | 2                                                | 8 873               | 8.0                                  | 0.64                                   | —                 |
| 15                                           | 241            | 0                           | 48                                               | 177 600             | 76.6                                 | 0.72                                   | 39                |
| 24                                           | 295            | 50                          | 4                                                | 9 022               | 8.0                                  | 0.64                                   | —                 |
| 52                                           | 288            | 100                         | 8                                                | 8 455               | 7.7                                  | 0.65                                   | —                 |
| 78                                           | 251            | 50                          | 12                                               | 8 506               | 7.7                                  | 0.66                                   | —                 |
| 98                                           | 284            | 50                          | 16                                               | 9 059               | 7.9                                  | 0.66                                   | —                 |
| 118                                          | 244            | 50                          | 20                                               | 9 372               | 8.0                                  | 0.67                                   | —                 |
| 123                                          | 114            | 50                          | 100                                              | 45 000              | 25.7                                 | 0.64                                   | 40                |
| 148                                          | 581            | 50                          | 24                                               | 8 996               | 7.9                                  | 0.67                                   | —                 |
| 177                                          | 586            | 100                         | 28                                               | 8 731               | 7.6                                  | 0.68                                   | —                 |
| 193                                          | 285            | 150                         | 32                                               | 9 160               | 7.8                                  | 0.69                                   | —                 |
| 213                                          | 292            | 50                          | 36                                               | 9 350               | 7.8                                  | 0.70                                   | —                 |
| 237                                          | 287            | 50                          | 40                                               | 9 347               | 7.7                                  | 0.70                                   | —                 |
| 249                                          | 211            | 50                          | 44                                               | 9 787               | 7.9                                  | 0.71                                   | —                 |
| 284                                          | 138            | 20                          | 48                                               | 9 356               | 7.7                                  | 0.71                                   | —                 |

a) Calculated as  $\text{DIB}/\text{waters} * 55.5 * 1000$ .

b) Beginning part of the simulation left out as equilibration.

c) Number of molecules in the system.

d) Analysed from the equilibrated part.

e) The number of reference where simulation files are available.

## References

- (1) Schamberger, J.; Clarke, R. J. Hydrophobic ion hydration and the magnitude of the dipole potential. *Biophys. J.* **2002**, *82*, 3081–3088.
- (2) Catte, A.; Girysh, M.; Javanainen, M.; Loison, C.; Melcr, J.; Miettinen, M. S.; Monticelli, L.; Maatta, J.; Oganessian, V. S.; Ollila, O. H. S.; Tynkkynen, J.; Vilov, S. Molecular electrometer and binding of cations to phospholipid bilayers. *Phys. Chem. Chem. Phys.* **2016**, *18*, 32560–32569.
- (3) Javanainen, M.; Melcrová, A.; Magarkar, A.; Jurkiewicz, P.; Hof, M.; Jungwirth, P.; Martinez-Seara, H. Two cations, two mechanisms: interactions of sodium and calcium with zwitterionic lipid membranes. *ChemComm* **2017**, *53*, 5380–5383.
- (4) Dias, C. L.; Jalali, S.; Yang, Y.; Cruz, L. Role of Cholesterol on Binding of Amyloid Fibrils to Lipid Bilayers. *J. Phys. Chem. B* . **2020**, *124*, 3036–3042.
- (5) Clarke, R. J. The dipole potential of phospholipid membranes and methods for its detection. *Adv. Colloid Interface Sci.* **2001**, *89-90*, 263–281.
- (6) Nencini, R. Etidocaine binding to POPC membrane, CHARMM36-SwissParam, 69 mM, 298 K . 2022; <https://doi.org/10.5281/zenodo.7010061>, Online; accessed 19 August 2022.
- (7) Nencini, R. Etidocaine binding to POPC membrane, CHARMM36-SwissParam, 138 mM, 298 K . 2022; <https://doi.org/10.5281/zenodo.7010083>, Online; accessed 19 August 2022.
- (8) Nencini, R. Etidocaine binding to POPC membrane, CHARMM36-SwissParam, 138 mM, 298 K, started from overbound . 2022; <https://doi.org/10.5281/zenodo.7010087>, Online; accessed 19 August 2022.

- (9) Nencini, R. Etidocaine binding to POPC membrane, CHARMM36-SwissParam, 138 mM, 298 K, 177 600 waters . 2022; <https://doi.org/10.5281/zenodo.7010110>, Online; accessed 19 August 2022.
- (10) Nencini, R. Etidocaine binding to POPC membrane, CHARMM36-SwissParam, 280 mM, 298 K . 2022; <https://doi.org/10.5281/zenodo.7010119>, Online; accessed 19 August 2022.
- (11) Nencini, R. Etidocaine binding to POPC membrane, CHARMM36-SwissParam, 280 mM, 298 K, started from overbound . 2022; <https://doi.org/10.5281/zenodo.7010136>, Online; accessed 19 August 2022.
- (12) Nencini, R. Etidocaine binding to POPC membrane, CHARMM36-SwissParam, 418 mM, 298 K . 2022; <https://doi.org/10.5281/zenodo.7010152>, Online; accessed 19 August 2022.
- (13) Nencini, R. Etidocaine binding to POPC membrane, CHARMM36-SwissParam, 418 mM, 298 K, started from overbound . 2022; <https://doi.org/10.5281/zenodo.7010154>, Online; accessed 19 August 2022.
- (14) Nencini, R. Etidocaine binding to POPC membrane, CHARMM36-ParamChem, 34 mM, 298 K . 2022; <https://doi.org/10.5281/zenodo.6988344>, Online; accessed 19 August 2022.
- (15) Nencini, R. Etidocaine binding to POPC membrane, CHARMM36-ParamChem, 69 mM, 298 K . 2022; <https://doi.org/10.5281/zenodo.7006630>, Online; accessed 19 August 2022.
- (16) Nencini, R. Etidocaine binding to POPC membrane, CHARMM36-ParamChem, 138 mM, 298 K . 2022; <https://doi.org/10.5281/zenodo.6988407>, Online; accessed 19 August 2022.

- (17) Nencini, R. Etidocaine binding to POPC membrane, CHARMM36-ParamChem, 200 mM, 298 K . 2022; <https://doi.org/10.5281/zenodo.7006630>, Online; accessed 19 August 2022.
- (18) Nencini, R. Etidocaine binding to POPC membrane, CHARMM36-ParamChem-ECC, 138 mM, 298 K . 2022; <https://doi.org/10.5281/zenodo.7006441>, Online; accessed 19 August 2022.
- (19) Nencini, R. TPP binding to POPC membrane, CHARMM36-ProteinFF, 138 mM, 298 K . 2022; <https://doi.org/10.5281/zenodo.6998195>, Online; accessed 18 August 2022.
- (20) Nencini, R. TPP binding to POPC membrane, CHARMM36-ProteinFF, 277 mM, 298 K . 2022; <https://doi.org/10.5281/zenodo.6998201>, Online; accessed 18 August 2022.
- (21) Nencini, R. TPP binding to POPC membrane, CHARMM36-ProteinFF, 416 mM, 298 K . 2022; <https://doi.org/10.5281/zenodo.6998205>, Online; accessed 18 August 2022.
- (22) Nencini, R. TPP binding to POPC membrane, CHARMM36-ProteinFF-ECC, 138 mM, 298 K . 2022; <https://doi.org/10.5281/zenodo.6998211>, Online; accessed 18 August 2022.
- (23) Nencini, R. TPP binding to POPC membrane, CHARMM36-ProteinFF-ECC, 277 mM, 298 K . 2022; <https://doi.org/10.5281/zenodo.6998215>, Online; accessed 18 August 2022.
- (24) Nencini, R. TPP binding to POPC membrane, CHARMM36-ProteinFF-ECC, 416 mM, 298 K . 2022; <https://doi.org/10.5281/zenodo.7000346>, Online; accessed 18 August 2022.

- (25) Nencini, R. TPP binding to POPC membrane, CHARMM36-QMcharges, 138 mM, 298 K . 2022; <https://doi.org/10.5281/zenodo.7000370>, Online; accessed 18 August 2022.
- (26) Nencini, R. TPP binding to POPC membrane, CHARMM36-QMcharges, 277 mM, 298 K . 2022; <https://doi.org/10.5281/zenodo.7000382>, Online; accessed 18 August 2022.
- (27) Nencini, R. TPP binding to POPC membrane, CHARMM36-QMcharges, 416 mM, 298 K . 2022; <https://doi.org/10.5281/zenodo.7000394>, Online; accessed 18 August 2022.
- (28) Nencini, R. TPP binding to POPC membrane, CHARMM36-QMcharges-ECC, 138 mM, 298 K . 2022; <https://doi.org/10.5281/zenodo.7000418>, Online; accessed 18 August 2022.
- (29) Nencini, R. TPP binding to POPC membrane, CHARMM36-QMcharges-ECC, 277 mM, 298 K . 2022; <https://doi.org/10.5281/zenodo.7000434>, Online; accessed 18 August 2022.
- (30) Nencini, R. TPP binding to POPC membrane, CHARMM36-QMcharges-ECC, 416 mM, 298 K . 2022; <https://doi.org/10.5281/zenodo.7000446>, Online; accessed 18 August 2022.
- (31) Nencini, R. TPP binding to POPC membrane, CHARMM36-QMcharges-Literature, 138 mM, 298 K . 2022; <https://doi.org/10.5281/zenodo.7000458>, Online; accessed 18 August 2022.
- (32) Nencini, R. TPP binding to POPC membrane, CHARMM36-QMcharges-Literature, 277 mM, 298 K . 2022; <https://doi.org/10.5281/zenodo.7000468>, Online; accessed 18 August 2022.

- (33) Nencini, R. TPP binding to POPC membrane, CHARMM36-QMcharges-Literature, 416 mM, 298 K . 2022; <https://doi.org/10.5281/zenodo.7000483>, Online; accessed 18 August 2022.
- (34) Nencini, R. TPP binding to POPC membrane, CHARMM36-QMcharges-Literature-ECC, 138 mM, 298 K . 2022; <https://doi.org/10.5281/zenodo.7000500>, Online; accessed 18 August 2022.
- (35) Nencini, R. TPP binding to POPC membrane, CHARMM36-QMcharges-Literature-ECC, 277 mM, 298 K . 2022; <https://doi.org/10.5281/zenodo.7000519>, Online; accessed 18 August 2022.
- (36) Nencini, R. TPP binding to POPC membrane, CHARMM36-QMcharges-Literature-ECC, 416 mM, 298 K . 2022; <https://doi.org/10.5281/zenodo.7000541>, Online; accessed 18 August 2022.
- (37) Nencini, R. SMS binding to POPC membrane, CHARMM36-ProteinFF, 39 mM, 298 K . 2022; <https://doi.org/10.5281/zenodo.7014209>, Online; accessed 22 August 2022.
- (38) Nencini, R. SMS binding to POPC membrane, CHARMM36-ProteinFF, 41 mM, 298 K, started from overbound . 2022; <https://doi.org/10.5281/zenodo.7014213>, Online; accessed 22 August 2022.
- (39) Nencini, R. Dibucaine binding to POPC membrane, CHARMM36-SwissParam, 15 mM, 298 K, started from overbound . 2022; <https://doi.org/10.5281/zenodo.7014252>, Online; accessed 22 August 2022.
- (40) Nencini, R. Dibucaine binding to POPC membrane, CHARMM36-SwissParam, 123 mM, 298 K . 2022; <https://doi.org/10.5281/zenodo.7014254>, Online; accessed 22 August 2022.
